# Supplementary material for: Hydrothermal liquefaction of high protein microalgae via clay material catalysts
Source: Royal Society of Chemistry journal article supplement (doi:10.1039/c7ra08311d), 2017-01-01

# Fig.S1. Total ion chromatograms of biocrude obtained without catalyst

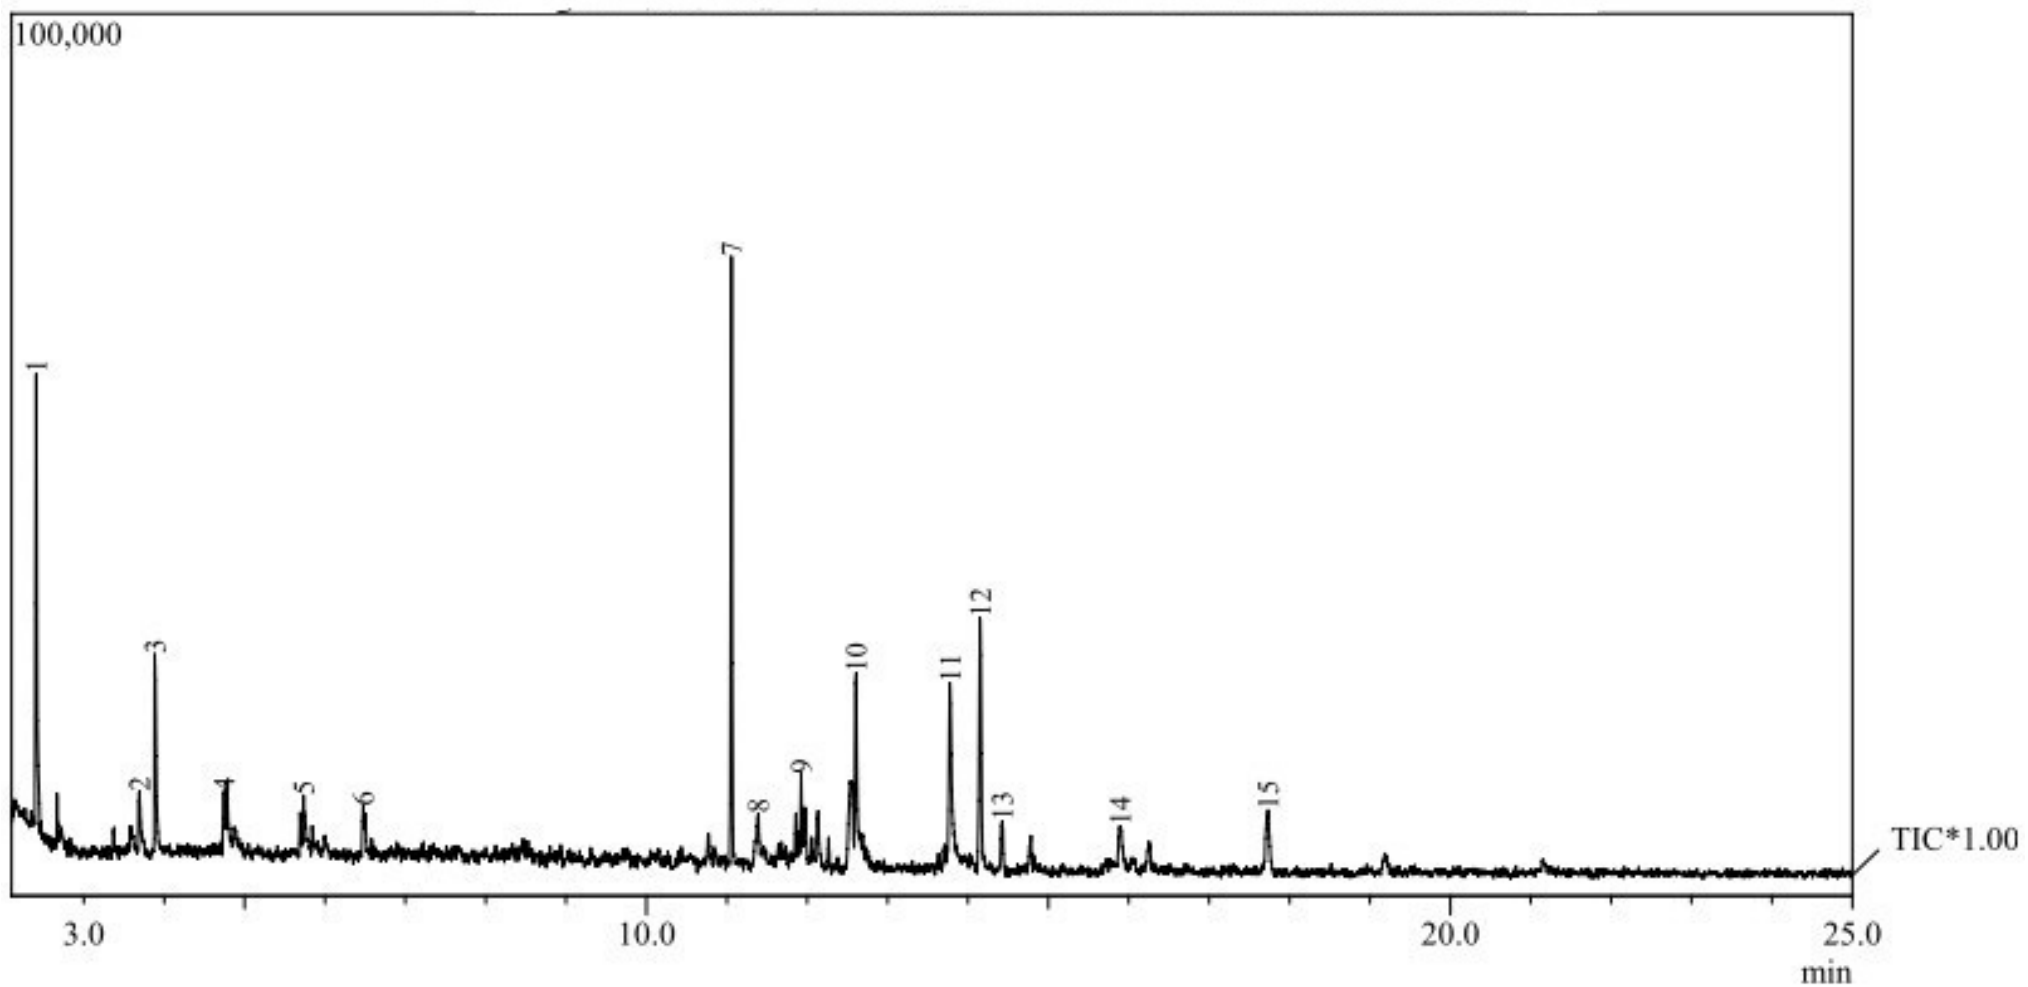

Fig.S2. Total ion chromatograms of biocrude obtained with Montmorillonite catalyst

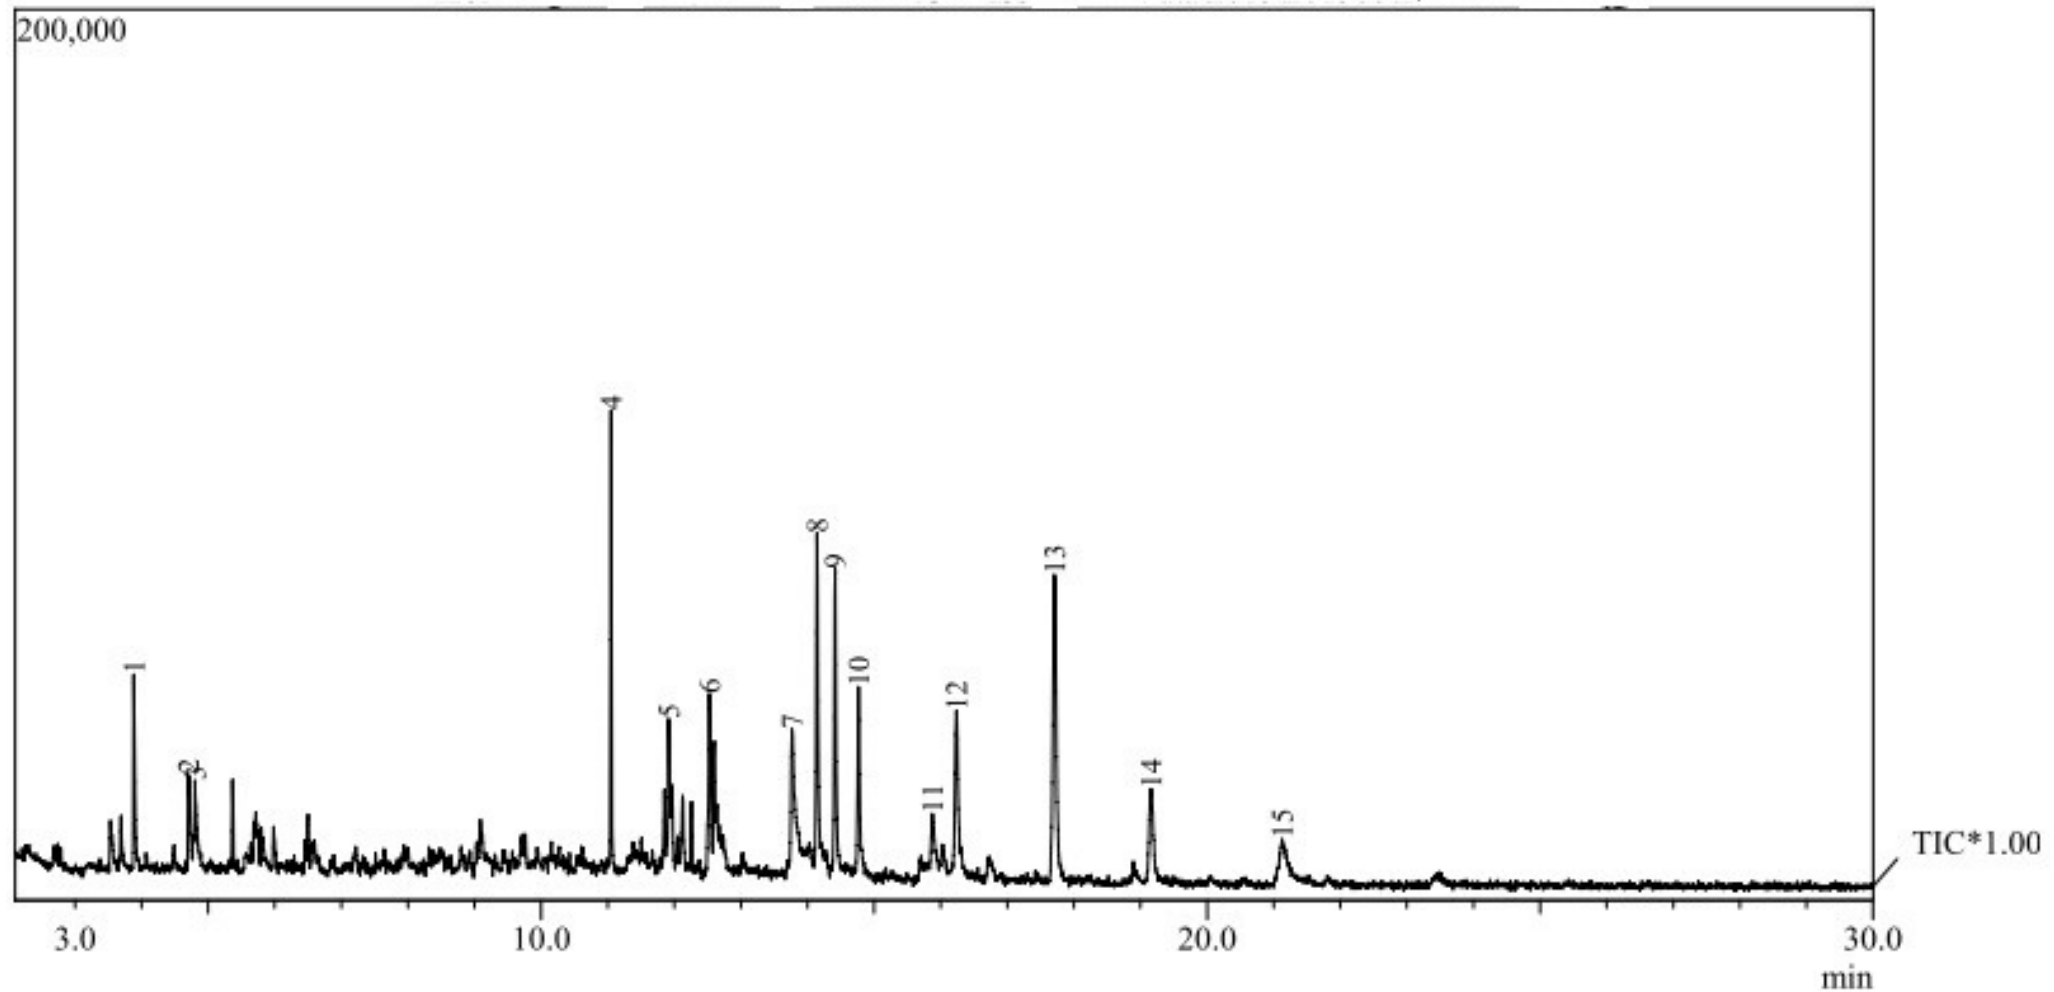

Fig.S3. Total ion chromatograms of biocrude obtained with Kaoline catalyst

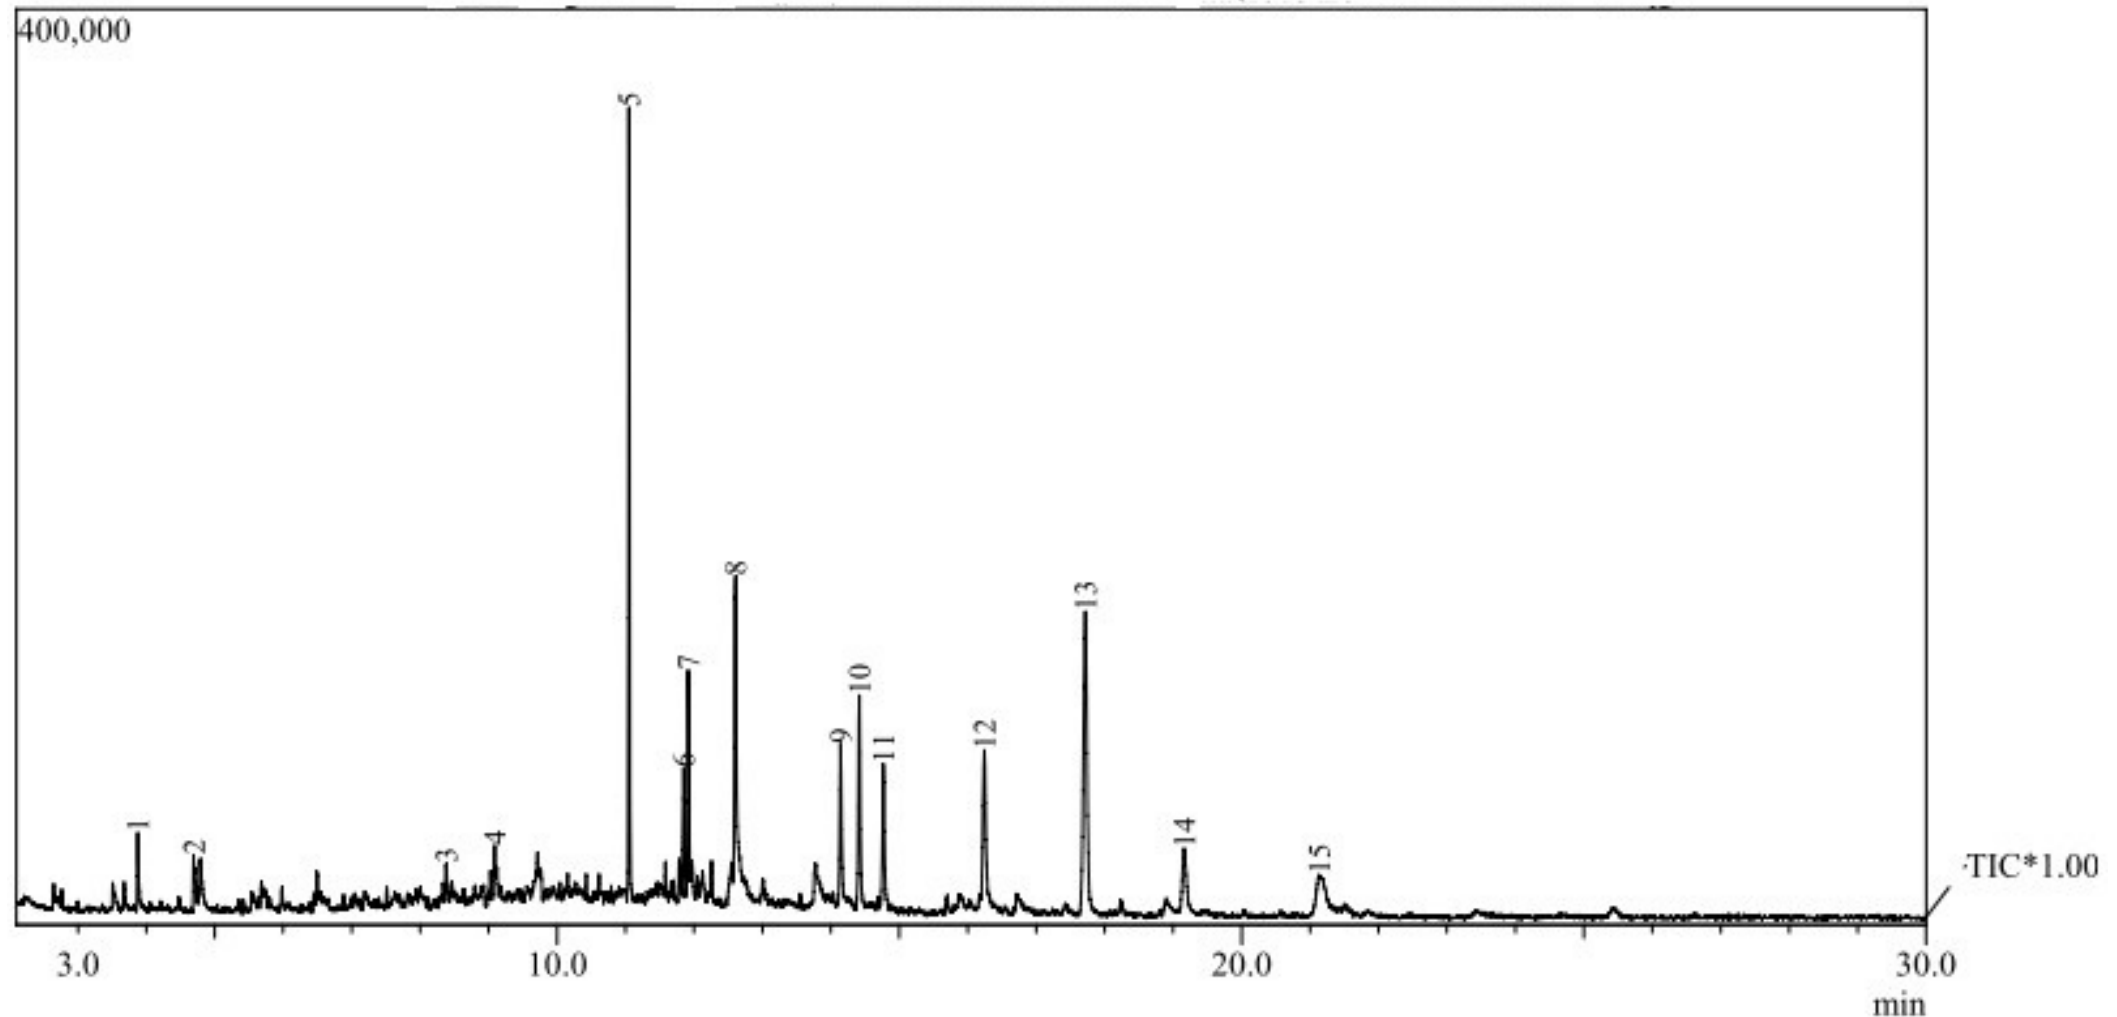

Fig.S4. Total ion chromatograms of biocrude obtained with Dolomitic limestone catalyst

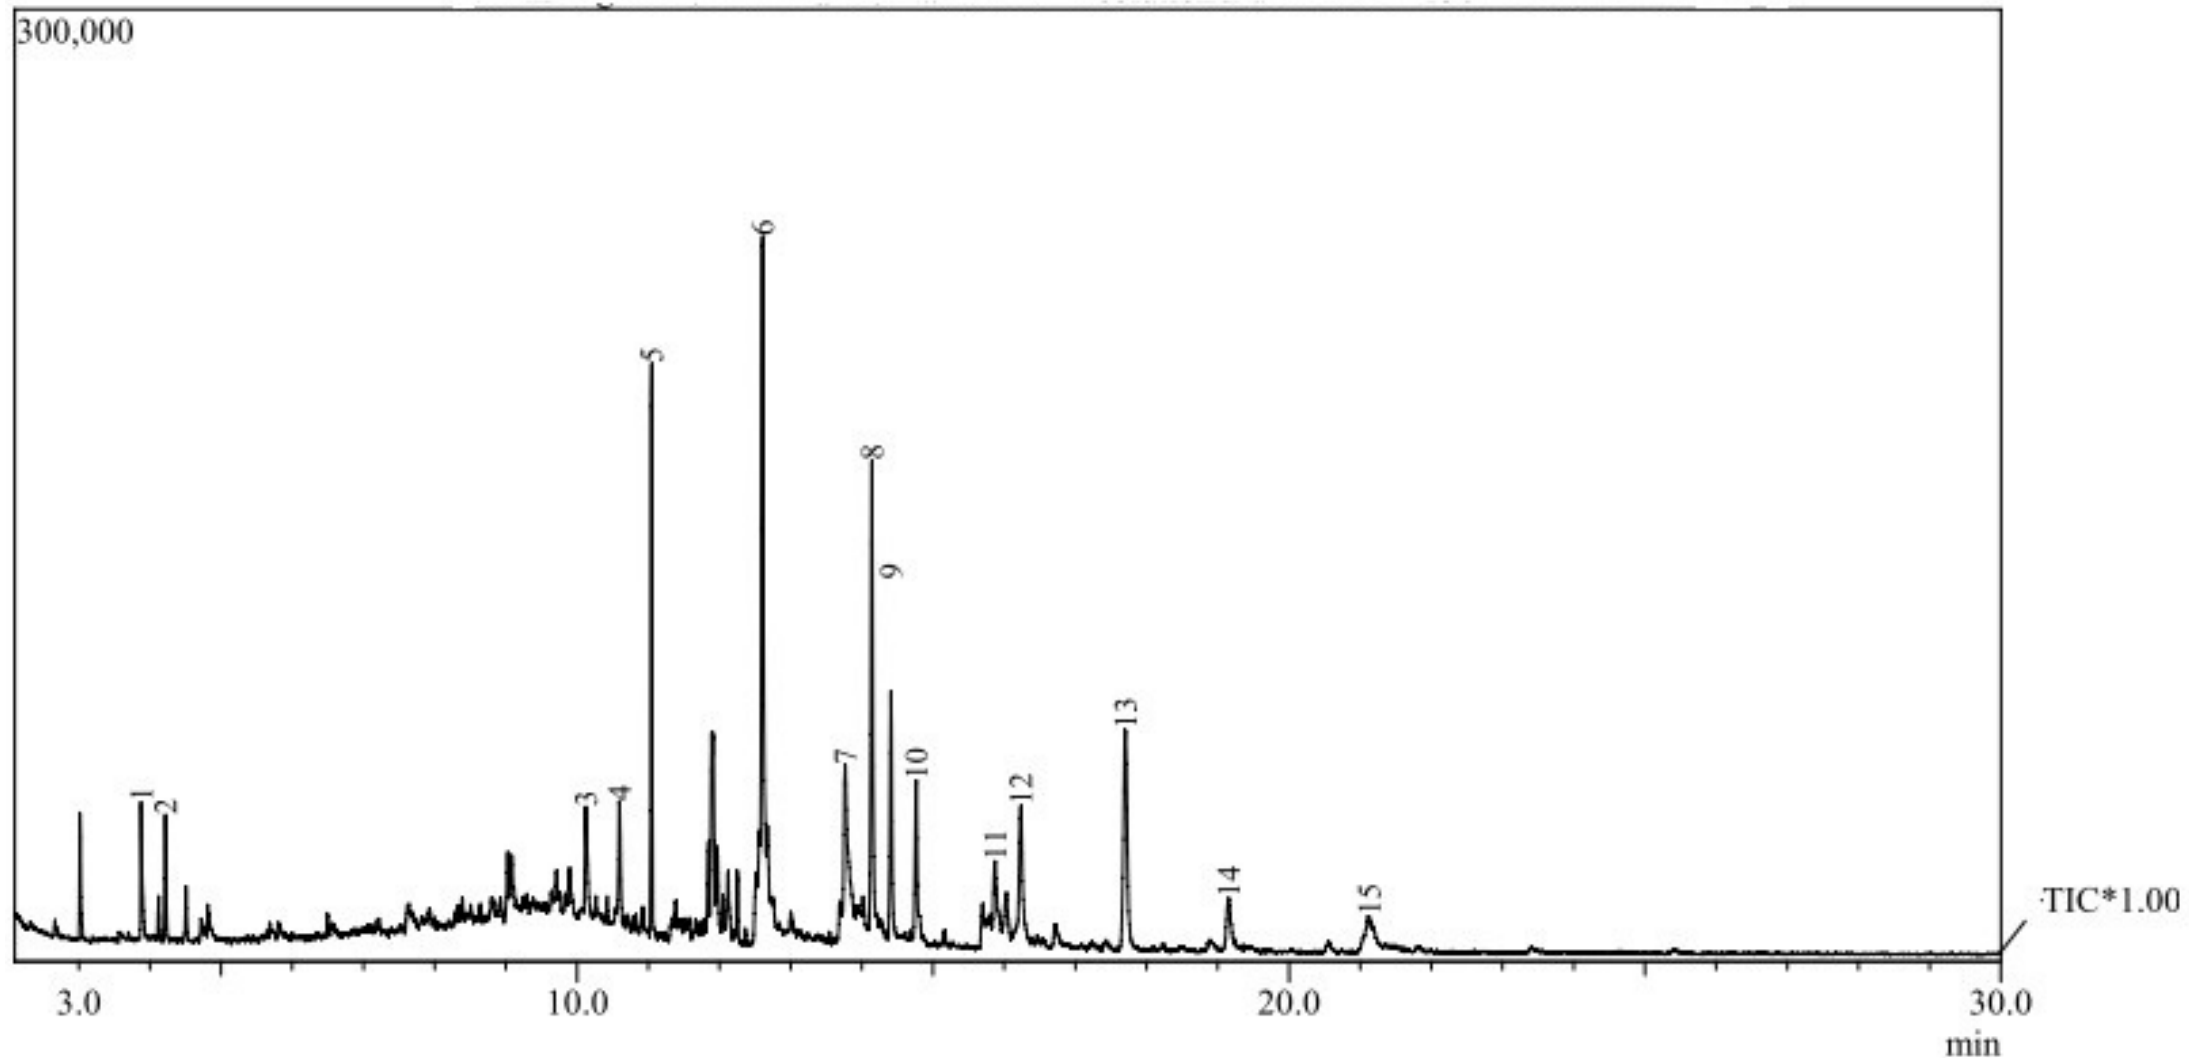

Supplement: c7ra08311d1.pdf [file c7ra08311d1.pdf]
